# Supplementary material for: Detecting Microsatellite Instability in Endometrial, Colon, and Stomach Cancers Using Targeted NGS
Source: MDPI journal article supplement (doi:10.3390/cancers15205065), 2023-10-20
Supplement: s1 [file s1]

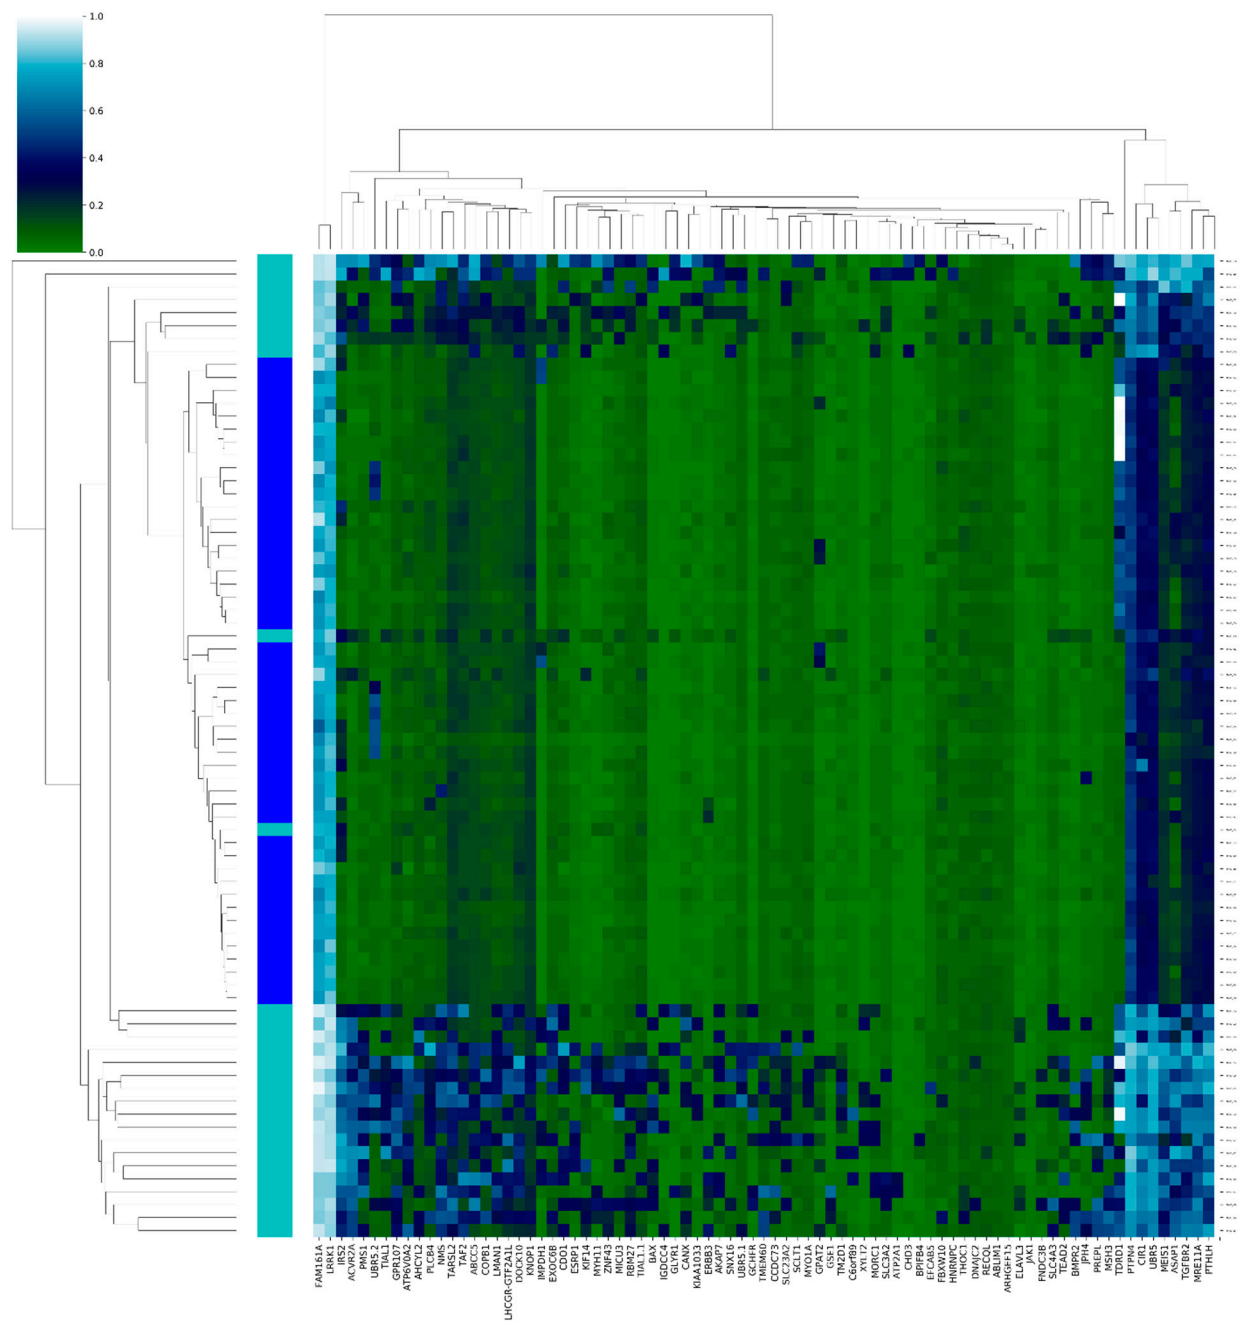

**Figure S4:** Heatmap indicating the proportions of loci with high variability in the colon cancers with proficient MMR (pMMR) and deficient MMR (dMMR) status. Loci are organized by hierarchical clustering into groups with similar variability patterns.
