# Supplementary material for: Detecting Microsatellite Instability in Endometrial, Colon, and Stomach Cancers Using Targeted NGS
Source: Cancers (Basel). 2023 Oct 20;15(20):5065. doi: 10.3390/cancers15205065 (PMC10605658; doi:10.3390/cancers15205065)
Supplement: Supplementary file 1 [file cancers-15-05065-s001.zip]

Archive with 5 entries (5 files):
- Supplementary Figures S1-S4.pdf
- Table_S1.xlsx
- Table_S2.xlsx
- Table_S3.xlsx
- Table_S4.xlsx
