# Supplementary material for: Detecting Microsatellite Instability in Endometrial, Colon, and Stomach Cancers Using Targeted NGS
Source: Cancers (Basel). 2023 Oct 20;15(20):5065. doi: 10.3390/cancers15205065 (PMC10605658; doi:10.3390/cancers15205065)
Supplement: Supplementary file 1 [file cancers-15-05065-s001.zip › Table_S1.xlsx]

## Sheet: Лист1
Sample_ID	cancer_type	%_tumor_cells	MSI_Score	MSI_status	ICH_MMR_status	hypermethilation	lynch_mut_1	lynch_mut_1_VAF	lynch_mut_2	lynch_mut_2_VAF	lynch_mut_3	lynch_mut_3_VAF
Tum_crc_973	STAD	40	5.8558	MSS
Tum_crc_962	STAD	30	6.0032	MSS
Tum_crc_941	STAD	60	6.0836	MSS	pMMR
Tum_crc_970	STAD	40	6.097	MSS
Tum_crc_907	STAD	70	6.1238	MSS
Tum_crc_788	STAD	60	6.1372	MSS	pMMR
Tum_crc_945	STAD	40	6.1372	MSS	pMMR
MMRD_362	STAD	40	6.15	MSS
Tum_crc_772	STAD	60	6.1774	MSS
Tum_crc_946	STAD	60	6.1774	MSS	pMMR
Tum_crc_972	STAD	40	6.2578	MSS
Tum_crc_966	STAD	60	6.2578	MSS
Tum_crc_808	STAD	50	6.2712	MSS
Tum_crc_815	STAD	40	6.2846	MSS
Tum_crc_942	STAD	40	6.3516	MSS
Tum_crc_961	STAD	70	6.365	MSS
Tum_crc_826	STAD	40	6.365	MSS
tum_crc_974	STAD	30	6.47	MSS
Tum_crc_780	STAD	70	6.4722	MSS	pMMR
Tum_crc_976	STAD	40	6.499	MSS
Tum_crc_933	STAD	30	6.5124	MSS	pMMR
Tum_crc_896	STAD	30	6.5258	MSS
Tum_crc_821	STAD	30	6.5392	MSS
Tum_crc_785	STAD	40	6.5392	MSS	pMMR
Tum_crc_949	STAD	60	6.566	MSS
Tum_crc_800	STAD	60	6.6062	MSS	pMMR
Tum_crc_968	STAD	30	6.6464	MSS	pMMR
Tum_crc_793	STAD	70	6.6732	MSS
Tum_crc_940	STAD	70	6.6732	MSS	pMMR
Tum_crc_792	STAD	60	6.6732	MSS
tum_crc_773	STAD	70	6.68	MSS	pMMR
tum_crc_766	STAD	70	6.74	MSS
Tum_crc_953	STAD	70	6.7402	MSS	pMMR
Tum_crc_925	STAD	40	6.7536	MSS
Tum_crc_911	STAD	60	6.767	MSS
Tum_crc_898	STAD	70	6.8206	MSS
tum_crc_957	STAD	40	6.86	MSS	pMMR
Tum_crc_781	STAD	70	6.8608	MSS
Tum_crc_893	STAD	60	6.8876	MSS
Tum_crc_934	STAD	70	6.901	MSS
Tum_crc_967	STAD	40	6.9278	MSS
Tum_crc_926	STAD	60	6.9278	MSS
Tum_crc_784	STAD	50	6.9412	MSS
Tum_crc_901	STAD	50	6.9412	MSS	pMMR
Tum_crc_796	STAD	50	6.9546	MSS	pMMR
MMRD_365	STAD	50	6.98	MSS
Tum_crc_811	STAD	40	6.9814	MSS
Tum_crc_916	STAD	30	7.0082	MSS
MMRD_366	STAD	50	7.02	MSS	pMMR
Tum_crc_825	STAD	50	7.0484	MSS	pMMR
tum_crc_979	STAD	40	7.07	MSS
Tum_crc_827	STAD	70	7.0886	MSS	pMMR
MMRD_509	STAD	20	7.11	MSS	pMMR
Tum_crc_971	STAD	70	7.1288	MSS	pMMR
tum_crc_798	STAD	60	7.15	MSS
tum_crc_809	STAD	50	7.17	MSS	pMMR
tum_crc_795	STAD	90	7.18	MSS	pMMR
Tum_crc_923	STAD	60	7.1958	MSS	pMMR
tum_crc_778	STAD	60	7.21	MSS
Tum_crc_929	STAD	70	7.236	MSS	pMMR
Tum_crc_779	STAD	70	7.236	MSS
Tum_crc_960	STAD	70	7.2494	MSS
tum_crc_830	STAD	50	7.28	MSS
MMRD_368	STAD	50	7.28	MSS
MMRD_369	STAD	40	7.32	MSS
tum_crc_835	STAD	50	7.34	MSS
MMRD_370	STAD	70	7.35	MSS	pMMR
Tum_crc_892	STAD	50	7.3834	MSS
Tum_crc_951	STAD	70	7.3834	MSS
Tum_crc_964	STAD	40	7.4236	MSS	pMMR
tum_crc_981	STAD	40	7.44	MSS	pMMR
MMRD_372	STAD	50	7.49	MSS
Tum_crc_818	STAD	30	7.4906	MSS	pMMR
MMRD_373	STAD	30	7.51	MSS
MMRD_374	STAD	60	7.51	MSS	pMMR
tum_crc_783	STAD	50	7.54	MSS	pMMR
MMRD_375	STAD	40	7.56	MSS
MMRD_376	STAD	70	7.56	MSS
tum_crc_813	STAD	70	7.57	MSS	pMMR
MMRD_487	STAD	40	7.59	MSS
MMRD_379	STAD	40	7.61	MSS	pMMR
tum_crc_847	STAD	60	7.63	MSS	pMMR
MMRD_380	STAD	60	7.63	MSS
Tum_crc_805	STAD	60	7.6514	MSS
MMRD_382	STAD	70	7.66	MSS
tum_crc_829	STAD	70	7.67	MSS	pMMR
Tum_crc_921	STAD	60	7.6782	MSS
MMRD_384	STAD	60	7.69	MSS
tum_crc_775	STAD	60	7.69	MSS
MMRD_321	STAD	60	7.73	MSS	pMMR
MMRD_385	STAD	60	7.74	MSS
tum_crc_947	STAD	50	7.74	MSS
Tum_crc_776	STAD	60	7.7452	MSS
MMRD_387	STAD	60	7.75	MSS
MMRD_389	STAD	60	7.78	MSS
tum_crc_927	STAD	30	7.78	MSS	pMMR
Tum_crc_902	STAD	50	7.7854	MSS
MMRD_390	STAD	80	7.8	MSS	pMMR
MMRD_326	STAD	60	7.8	MSS	pMMR
tum_crc_943	STAD	70	7.81	MSS
tum_crc_931	STAD	60	7.85	MSS
MMRD_392	STAD	40	7.85	MSS
MMRD_393	STAD	60	7.86	MSS
tum_crc_791	STAD	50	7.88	MSS	pMMR	neg
tum_crc_848	STAD	70	7.88	MSS
MMRD_394	STAD	80	7.89	MSS
tum_crc_771	STAD	60	7.9	MSS	pMMR
MMRD_395	STAD	60	7.9	MSS	pMMR
MMRD_396	STAD	50	7.91	MSS	pMMR
MMRD_397	STAD	50	7.92	MSS
MMRD_398	STAD	60	7.93	MSS
tum_crc_980	STAD	60	7.94	MSS
tum_crc_874	STAD	60	7.94	MSS	pMMR
MMRD_328	STAD	40	7.95	MSS	pMMR
MMRD_315	STAD	70	7.98	MSS	pMMR
MMRD_399	STAD	30	8	MSS	pMMR
MMRD_314	STAD	50	8.01	MSS	pMMR
tum_crc_975	STAD	70	8.01	MSS	pMMR
MMRD_400	STAD	50	8.03	MSS
MMRD_322	STAD	50	8.07	MSS	pMMR
MMRD_324	STAD	30	8.07	MSS	pMMR
tum_crc_817	STAD	40	8.09	MSS	pMMR
MMRD_401	STAD	60	8.09	MSS
MMRD_402	STAD	30	8.11	MSS
tum_crc_769	STAD	70	8.11	MSS
MMRD_403	STAD	30	8.11	MSS	pMMR
MMRD_404	STAD	30	8.12	MSS
MMRD_313	STAD	40	8.13	MSS	pMMR
tum_crc_903	STAD	50	8.13	MSS
MMRD_405	STAD	70	8.13	MSS
MMRD_291	STAD	50	8.15	MSS
MMRD_406	STAD	60	8.15	MSS
MMRD_312	STAD	50	8.17	MSS	pMMR
Tum_crc_959	STAD	70	8.174	MSS	pMMR
MMRD_407	STAD	60	8.2	MSS	pMMR
MMRD_288	STAD	70	8.2	MSS
tum_crc_794	STAD	50	8.22	MSS	pMMR
MMRD_293	STAD	80	8.23	MSS
tum_crc_859	STAD	20	8.26	MSS	pMMR
MMRD_297	STAD	40	8.27	MSS
MMRD_330	STAD	50	8.28	MSS	pMMR
tum_crc_814	STAD	40	8.29	MSS
MMRD_318	STAD	70	8.33	MSS	pMMR
MMRD_408	STAD	50	8.35	MSS
MMRD_409	STAD	40	8.37	MSS
MMRD_287	STAD	30	8.39	MSS
tum_crc_797	STAD	60	8.4	MSS
MMRD_285	STAD	60	8.4	MSS
MMRD_316	STAD	60	8.41	MSS	pMMR
MMRD_290	STAD	50	8.43	MSS
MMRD_311	STAD	60	8.45	MSS	pMMR
MMRD_317	STAD	70	8.46	MSS	pMMR
MMRD_410	STAD	60	8.47	MSS
MMRD_329	STAD	40	8.48	MSS	pMMR
MMRD_411	STAD	60	8.49	MSS
MMRD_327	STAD	50	8.5	MSS	pMMR	neg
MMRD_412	STAD	60	8.51	MSS	pMMR	neg
Tum_crc_928	STAD	40	8.5358	MSS	pMMR
MMRD_302	STAD	70	8.63	MSS
tum_crc_978	STAD	60	8.66	MSS	pMMR
MMRD_415	STAD	60	8.67	MSS	pMMR
tum_crc_782	STAD	60	8.71	MSS		neg
tum_crc_767	STAD	70	8.74	MSS		neg
MMRD_301	STAD	60	8.79	MSS		neg
MMRD_323	STAD	30	8.9	MSS	pMMR	neg
MMRD_286	STAD	20	8.94	MSS		neg
MMRD_416	STAD	60	8.96	MSS	pMMR
MMRD_325	STAD	50	8.96	MSS	pMMR	neg
tum_crc_965	STAD	70	8.99	MSS		neg
tum_crc_819	STAD	30	9.06	MSS		neg
MMRD_292	STAD	50	9.15	MSS		neg
MMRD_413	STAD	50	9.23	MSS	pMMR	neg	wt
MMRD_294	STAD	40	9.29	MSS
MMRD_417	STAD	60	10.44	MSI	MLH1-; PMS2-
tum_crc_768	STAD	50	10.54	MSI		pos
MMRD_418	STAD	20	11.61	MSI	MLH1-; PMS2-	pos	MSH6_c.2910G>A	0.09231
Tum_crc_812	STAD	30	13.1186	MSI		pos
MMRD_419	STAD	40	13.57	MSI	MLH1-; PMS2-	pos	wt
MMRD_305	STAD	80	13.65	MSI		pos	MLH1_c.1731G>A	0.66667
MMRD_299	STAD	40	14.33	MSI	MLH1-; PMS2-	pos
MMRD_289	STAD	30	14.51	MSI	MLH1-; PMS2-	pos	MSH6_c.1190A>G	0.13307
Tum_crc_937	STAD	70	15.0214	MSI
MMRD_320	STAD	30	16.07	MSI	MLH1-; PMS2-	neg
MMRD_420	STAD	60	16.27	MSI	MLH1-; PMS2-
Tum_crc_958	STAD	70	17.5004	MSI
MMRD_319	STAD	40	18.18	MSI	MLH1-; PMS2-	pos	wt
MMRD_304	STAD	80	18.59	MSI
MMRD_298	STAD	50	22.05	MSI		pos	wt
MMRD_295	STAD	40	23.76	MSI			MSH6_c.3261delC	0.34934	MSH6_c.3261dupC	0.16157
MMRD_296	STAD	30	25.96	MSI			MSH6_c.3261delC	0.28733	MSH6_c.3261dupC	0.19847
MMRD_455	UCEC	30	4.87	MSS	pMMR
MMRD_464	UCEC	40	5.04	MSS	pMMR
MMRD_469	UCEC	30	5.5	MSS	pMMR
MMRD_454	UCEC	40	5.77	MSS	pMMR
MMRD_460	UCEC	60	5.98	MSS	pMMR
MMRD_472	UCEC	70	6.05	MSS	pMMR
MMRD_475	UCEC	80	6.1	MSS	pMMR
MMRD_471	UCEC	60	6.19	MSS	pMMR
MMRD_465	UCEC	50	6.29	MSS	pMMR
MMRD_458	UCEC	50	6.32	MSS	pMMR
MMRD_473	UCEC	50	6.41	MSS	pMMR
MMRD_474	UCEC	50	6.52	MSS	pMMR
MMRD_456	UCEC	70	6.56	MSS	pMMR
MMRD_457	UCEC	40	6.74	MSS	pMMR
MMRD_421	UCEC	50	6.82	MSS	pMMR
MMRD_719	UCEC	80	6.99	MSS
MMRD_737	UCEC	40	7.05	MSS
MMRD_448	UCEC	70	7.14	MSS	pMMR
MMRD_453	UCEC	80	7.16	MSS	pMMR
MMRD_739	UCEC	30	7.36	MSS
MMRD_451	UCEC	40	7.4	MSS	pMMR
MMRD_725	UCEC	50	7.41	MSS
MMRD_452	UCEC	70	7.42	MSS	pMMR
MMRD_730	UCEC	30	7.46	MSS
MMRD_447	UCEC	80	7.46	MSS	pMMR
MMRD_434	UCEC	70	7.48	MSS
MMRD_467	UCEC	50	7.53	MSS	pMMR
MMRD_449	UCEC	40	7.53	MSS	pMMR
MMRD_432	UCEC	70	7.6	MSS	pMMR
MMRD_440	UCEC	50	7.66	MSS	pMMR
MMRD_426	UCEC	30	7.685	MSS
MMRD_445	UCEC	40	7.7	MSS	pMMR
MMRD_444	UCEC	30	7.72	MSS	pMMR
MMRD_718	UCEC	80	7.73	MSS
MMRD_715	UCEC	30	7.74	MSS
MMRD_735	UCEC	80	7.76	MSS
MMRD_729	UCEC	40	7.77	MSS
MMRD_424	UCEC	70	7.855	MSS
MMRD_442	UCEC	80	7.86	MSS
MMRD_427	UCEC	70	7.865	MSS
MMRD_446	UCEC	70	7.92	MSS	pMMR
MMRD_443	UCEC	80	7.94	MSS	pMMR
MMRD_672	UCEC	40	7.96	MSS	pMMR
MMRD_728	UCEC	80	8.01	MSS	pMMR
MMRD_674	UCEC	80	8.02	MSS	pMMR
MMRD_663	UCEC	40	8.05	MSS	pMMR
MMRD_430	UCEC	60	8.09	MSS	pMMR
MMRD_724	UCEC	30	8.1	MSS	pMMR
MMRD_671	UCEC	60	8.13	MSS	pMMR
MMRD_012	UCEC	70	8.14	MSS	pMMR
MMRD_722	UCEC	70	8.14	MSS
MMRD_547	UCEC_metastasis to a lymph node from the uterus	25	8.18	MSS	MLH1-; PMS2-	neg	wt
MMRD_450	UCEC	50	8.19	MSS	pMMR
MMRD_534	UCEC	50	8.19	MSS	MLH1-; PMS2-	pos	PMS2_c.1351dupA	0.092356
MMRD_678	UCEC	60	8.2	MSS	pMMR
MMRD_425	UCEC	60	8.205	MSS	pMMR
MMRD_731	UCEC	50	8.25	MSS	pMMR
MMRD_664	UCEC	30	8.26	MSS	pMMR
MMRD_684	UCEC	60	8.29	MSS	pMMR
MMRD_669	UCEC	60	8.3	MSS	pMMR
MMRD_429	UCEC	20	8.33	MSS	pMMR
MMRD_439	UCEC	90	8.35	MSS	pMMR
MMRD_010	UCEC	30	8.38	MSS	pMMR
MMRD_436	UCEC	30	8.4	MSS	pMMR
MMRD_433	UCEC	50	8.43	MSS	pMMR
MMRD_695	UCEC	80	8.46	MSS	pMMR
MMRD_675	UCEC	90	8.47	MSS	pMMR
MMRD_667	UCEC	80	8.53	MSS	pMMR
MMRD_686	UCEC	60	8.63	MSS	pMMR
MMRD_721	UCEC	60	8.65	MSS	pMMR
MMRD_733	UCEC	40	8.75	MSS	pMMR
MMRD_688	UCEC	50	8.76	MSS	pMMR
MMRD_687	UCEC	60	8.81	MSS	pMMR
MMRD_032	UCEC	80	8.9	MSS	pMMR
MMRD_033	UCEC	80	8.94	MSS	pMMR
MMRD_685	UCEC	40	8.95	MSS	pMMR
MMRD_732	UCEC	60	8.98	MSS	pMMR
MMRD_720	UCEC	70	8.99	MSS	pMMR
MMRD_690	UCEC	30	9.01	MSS	pMMR
MMRD_673	UCEC	40	9.03	MSS	pMMR
MMRD_668	UCEC	60	9.06	MSS	pMMR
MMRD_694	UCEC	80	9.1	MSS	pMMR
MMRD_689	UCEC	30	9.11	MSS	pMMR
MMRD_693	UCEC	50	9.12	MSS	pMMR
MMRD_024	UCEC	40	9.14	MSS	MLH1-; PMS2-
MMRD_676	UCEC	80	9.25	MSS	pMMR
MMRD_459	UCEC	30	9.31	MSS	MLH1-	pos	wt
MMRD_670	UCEC	40	9.32	MSS	pMMR
MMRD_734	UCEC	30	9.35	MSS	pMMR
MMRD_691	UCEC	50	9.39	MSS	pMMR
MMRD_677	UCEC	50	9.51	MSS	pMMR
MMRD_712	UCEC	50	9.51	MSS	MLH1-; PMS2-	pos	wt
MMRD_700	UCEC	65	9.57	MSS	MLH1-; PMS2-	pos	wt
MMRD_723	UCEC	40	9.66	MSS	pMMR
MMRD_727	UCEC	70	9.76	MSS	pMMR
MMRD_711	UCEC	55	9.78	MSS	MLH1-; PMS2-	pos	wt
MMRD_541	UCEC	70	9.83	MSS	MLH1-; PMS2-	neg	MLH1_c.884+1G>A	0.21963
MMRD_726	UCEC	60	10	MSI	MLH1-; PMS2-	pos
MMRD_665	UCEC	30	10	MSI	MLH1-; PMS2-	pos	wt
MMRD_027	UCEC	60	10	MSI	MLH1-; PMS2-
MMRD_531	UCEC	80	10	MSI	MLH1-; PMS2-	pos
MMRD_535	UCEC	60	10.075	MSI	MLH1-; PMS2-
MMRD_013	UCEC	90	10.2	MSI	MLH1-; PMS2-	pos	PMS2_c.52A>G_missense_variant	0.54881
MMRD_028	UCEC	70	10.5	MSI	MLH1-; PMS2-
MMRD_525	UCEC	90	10.52	MSI	MLH1-; PMS2-
MMRD_707	UCEC	45	10.59	MSI	MLH1-; PMS2-
MMRD_736	UCEC	50	10.63	MSI
MMRD_546	UCEC	70	10.795	MSI	MLH1-; PMS2-
MMRD_019	UCEC	20	10.83	MSI	MLH1-; PMS2-	pos	PMS2_c.706-1G>T_splice_acceptor_variant&intron_variant	0.09677
MMRD_702	UCEC	90	10.9	MSI	MSH6-
MMRD_423	UCEC	80	10.93	MSI	MLH1-; PMS2-		MSH2_c.211+2T>G_splice_donor_variant&intron_variant	0.09684
MMRD_026	UCEC	60	11.07	MSI	MLH1-; PMS2-	pos	wt
MMRD_692	UCEC	50	11.24	MSI
MMRD_697	UCEC	80	11.43	MSI	MLH1-; PMS2-
MMRD_666	UCEC	70	11.44	MSI
MMRD_682	UCEC	40	11.48	MSI
MMRD_709	UCEC	85	11.71	MSI	MLH1-; PMS2-
MMRD_428	UCEC	90	11.765	MSI			MSH2_c.725delA_frameshift_variant	0.17603
MMRD_015	UCEC	70	11.88	MSI	MSH2-	neg	MSH6_c.3261delC_frameshift_variant	0.37919
MMRD_021	UCEC	60	12.05	MSI	MLH1-; PMS2-	pos	MLH1_c.1667+2T>G_splice_donor_variant&intron_variant	0.07471	MSH2_c.211+2T>G_splice_donor_variant&intron_variant	0.08174
MMRD_680	UCEC	40	12.09	MSI
MMRD_679	UCEC	60	12.22	MSI
MMRD_031	UCEC	60	12.26	MSI	MSH2-; MSH6-	neg
MMRD_683	UCEC	40	12.32	MSI
MMRD_528	UCEC	50	12.47	MSI	MLH1-; PMS2- (heterogeneity about 15%)
MMRD_544	UCEC	50	12.505	MSI	MLH1-; PMS2-
MMRD_025	UCEC	50	12.63	MSI	MLH1-; PMS2-	pos	MSH2_c.1030C>T_stop_gained	0.09375	PMS2_c.1351dupA	0.09	PMS2_c.1351dupA_frameshift_variant	0.10569
MMRD_014	UCEC	80	12.7	MSI	MLH1-; PMS2-		MLH1_c.884+1G>A	0.375
MMRD_023	UCEC	35	12.8	MSI	MSH2-; MSH6-	pos	MSH2_c.1450delA_frameshift_variant	0.10086	MSH2_c.1705_1706delGA_frameshift_variant	0.11268	MSH2_c.211+2T>G_splice_donor_variant&intron_variant	0.09626
MMRD_008	UCEC	70	12.83	MSI	MLH1-; PMS2-	pos	PMS2_c.2341C>T_stop_gained	0.06818
MMRD_003	UCEC	40	13.17	MSI	MSH2-; MSH6-	neg	MSH2_c.1862delG_frameshift_variant	0.19814
MMRD_716	UCEC	30	13.18	MSI
MMRD_699	UCEC	70	13.34	MSI	MLH1-; PMS2-
MMRD_431	UCEC	50	13.8	MSI	MLH1-		MSH2_c.211+2T>G_splice_donor_variant&intron_variant	0.1068
MMRD_526	UCEC	90	13.91	MSI	MLH1-; PMS2-
MMRD_539	UCEC	90	13.97	MSI	MLH1-; PMS2-
MMRD_529	UCEC	60	14.02	MSI	MLH1-; PMS2-
MMRD_438	UCEC	70	14.125	MSI	MLH1-		wt
MMRD_022	UCEC	70	14.14	MSI	MLH1-; PMS2-	pos	PMS2_c.3G>A_start_lost	0.01175
MMRD_706	UCEC	90	14.37	MSI	MLH1-; PMS2-
MMRD_018	UCEC	80	14.4	MSI	MLH1-; PMS2-	pos	wt
MMRD_007	UCEC	30	14.41	MSI	MLH1-; PMS2-	pos	MLH1_c.776T>A_stop_gained	0.18519
MMRD_738	UCEC	20	14.47	MSI
MMRD_011	UCEC	60	14.57	MSI	MLH1-; PMS2-	pos	MSH6_c.3261dupC_frameshift_variant	0.22222
MMRD_710	UCEC	90	14.71	MSI	MLH1-; PMS2-
MMRD_532	UCEC	90	14.8	MSI	MLH1-; PMS2-
MMRD_703	UCEC	90	15.07	MSI	MLH1-; PMS2-
MMRD_009	UCEC	80	15.11	MSI	MLH1-; PMS2-	pos	MLH1_c.1667+2T>G_splice_donor_variant&intron_variant	0.0814
MMRD_714	UCEC	80	15.13	MSI	MLH1-; PMS2-
MMRD_029	UCEC	60	15.31	MSI	MLH1-; PMS2-	pos	wt
MMRD_006	UCEC	60	15.93	MSI	MLH1-; PMS2-	pos	MSH6_c.496delT_frameshift_variant	0.34309
MMRD_422	UCEC	40	16.45	MSI	MLH1-; PMS2-		wt
MMRD_017	UCEC	50	16.5	MSI	MLH1-; PMS2-	pos	MSH2_c.211+2T>G_splice_donor_variant&intron_variant	0.10791	MSH2_c.2038C>T_stop_gained	0.07071
MMRD_437	UCEC	40	16.71	MSI	MLH1-		wt
MMRD_542	UCEC	70	16.9	MSI	MLH1-; PMS2-
MMRD_701	UCEC	40	16.92	MSI	MLH1-; PMS2-
MMRD_540	UCEC	90	16.93	MSI	MLH1-; PMS2-
MMRD_543	UCEC	80	16.98	MSI	MLH1-; PMS2-
MMRD_533	UCEC	90	17.26	MSI	MLH1-; PMS2-
MMRD_441	UCEC	80	17.92	MSI	MLH1-		MSH2_c.687delA_frameshift_variant	0.39149
MMRD_005	UCEC	50	18.27	MSI	MLH1-; PMS2-	pos	MLH1_c.1564C>T_missense_variant	0.745357	MLH1_c.588+1G>A_splice_donor_variant&intron_variant	0.785798
MMRD_020	UCEC	30	19.46	MSI	MSH2-; MSH6-	neg	MLH1_c.302G>A_missense_variant	0.09412
MMRD_036	COAD		8.12	MSS
MMRD_037	COAD		8.12	MSS
MMRD_038	COAD		8.65	MSS
MMRD_039	COAD		8.83	MSS
MMRD_040	COAD		8.39	MSS
MMRD_041	COAD		9.305	MSS
MMRD_042	COAD		8.15	MSS
MMRD_043	COAD		8.17	MSS
MMRD_044	COAD		8.49	MSS
MMRD_045	COAD		8.7	MSS
MMRD_046	COAD		9.09	MSS
MMRD_047	COAD		8.84	MSS
MMRD_049	COAD		16.13	MSI			wt
MMRD_050	COAD	40	30.82	MSI			MLH1_c.492dupA_frameshift_variant	0.38558
MMRD_051	COAD		14.81	MSI			wt
MMRD_052	COAD	50	15.67	MSI			MSH6_c.2150_2153delTCAG_frameshift_variant	0.50082	MSH6_c.3261dupC_frameshift_variant	0.29217
MMRD_054	COAD	40	19.9	MSI			MSH6_c.3261dupC_frameshift_variant	0.35188
MMRD_060	COAD	30	8.9	MSS	pMMR	neg
MMRD_062	COAD	40	8.7	MSS	pMMR
MMRD_064	COAD	40	16.13	MSI	MSH2-; MSH6-	neg	MSH2_c.1906G>C_missense_variant	0.44665	MSH2_c.2131C>T_stop_gained	0.14409
MMRD_066	COAD	50	6.97	MSS	pMMR
MMRD_068	COAD	30	11.3	MSI	MLH1-; PMS2-; гетепрогенная по MSH6 и MSH2	pos	MSH6_c.3261delC_frameshift_variant	0.10959	MSH6_c.3202C>T_stop_gained	0.08333
MMRD_070	COAD	80	8.48	MSS	pMMR
MMRD_072	COAD	30	19.86	MSI	MSH2-; MSH6-		MSH2_c.633dupG_frameshift_variant	0.35624
MMRD_074	COAD	40	8.95	MSS
MMRD_076	COAD	50	20.81	MSI	MLH1-; PMS2-		MSH2_c.211+2T>G_splice_donor_variant&intron_variant	0.10714	MLH1_c.199G>A_missense_variant	0.21733
MMRD_078	COAD	40	21.29	MSI		pos	wt
MMRD_080	COAD	70	8.58	MSS	pMMR
MMRD_082	COAD	30	8.64	MSS	pMMR
MMRD_084	COAD	60	6.85	MSS	pMMR
MMRD_086	COAD	60	8.95	MSS
MMRD_088	COAD	70	8.64	MSS
MMRD_090	COAD	40	8.71	MSS	pMMR
MMRD_092	COAD	30	8.63	MSS
MMRD_094	COAD	80	8.21	MSS	pMMR
MMRD_096	COAD	30	14.75	MSI	MLH1-; PMS2-	pos	PMS2_c.1239delA_frameshift_variant	0.15194	MSH6_c.3261delC_frameshift_variant	0.169
MMRD_098	COAD	50	8.37	MSS
MMRD_100	COAD	70	17.71	MSI	MLH1-; PMS2-		MSH2_c.211+2T>G_splice_donor_variant&intron_variant	0.08187	MSH2_c.1273G>T_stop_gained	0.06593
MMRD_102	COAD	80	8.66	MSS
MMRD_104	COAD	90	11.9445	MSI	MLH1-; PMS2-; гетерогенная по MSH6		wt
MMRD_106	COAD	90	8.81	MSS	pMMR	neg
MMRD_108	COAD	40	16.69	MSI			MSH6_c.3261dupC_frameshift_variant	0.20396
MMRD_110	COAD	60	8.58	MSS
MMRD_112	COAD	70	7.9	MSS
MMRD_114	COAD	80	8.51	MSS	pMMR	neg
MMRD_116	COAD	80	17.33	MSI	MLH1-; PMS2-	neg	MLH1_c.677G>A_missense_variant&splice_region_variant	0.79251
MMRD_118	COAD	70	8.74	MSS	pMMR	neg
MMRD_120	COAD	30	16.13	MSI	MLH1-; PMS2-	pos	wt
MMRD_122	COAD	40	7.55	MSS	pMMR	neg
MMRD_124	COAD	60	8.66	MSS	pMMR
MMRD_126	COAD	80	8.47	MSS
MMRD_128	COAD	60	8.49	MSS
MMRD_130	COAD	70	8.79	MSS	pMMR	neg
MMRD_132	COAD	70	7.04	MSS	pMMR	neg
MMRD_134	COAD	70	17.7	MSI	MLH1-; PMS2-	neg
MMRD_136	COAD	80	7.05	MSS
MMRD_138	COAD	40	23.13	MSI	MLH1-; PMS2-	pos	MSH6_c.3261delC_frameshift_variant	0.3516	MSH2_c.1801C>T_stop_gained	0.07229
MMRD_140	COAD	50	10.01	MSI	pMMR	neg	MSH2_c.1588G>T_stop_gained	0.48905
MMRD_142	COAD	80	8.5	MSS
MMRD_144	COAD	30	8.55	MSS
MMRD_146	COAD	80	9.13	MSS	pMMR	neg
MMRD_148	COAD	60	8.18	MSS
MMRD_150	COAD	30	8.16	MSS
MMRD_152	COAD	40	8.05	MSS	pMMR	neg
MMRD_154	COAD	30	9.04	MSS	pMMR	pos
MMRD_156	COAD	30	8.81	MSS	pMMR	pos
MMRD_158	COAD	40	8.62	MSS	pMMR	neg
MMRD_160	COAD	50	8.1	MSS	pMMR	neg
MMRD_162	COAD	50	8.48	MSS	pMMR
MMRD_172	COAD	30	9.22	MSS	pMMR	neg
MMRD_174	COAD	50	7.69	MSS	pMMR	neg
MMRD_176	COAD	60	8.42	MSS	pMMR
MMRD_178	COAD	80	9.11	MSS	pMMR	neg
MMRD_180	COAD	30	7.91	MSS
MMRD_182	COAD	60	8.42	MSS	pMMR
MMRD_184	COAD	30	26.12	MSI		neg
MMRD_186	COAD	70	24.59	MSI	MLH1-; PMS2-	neg	MLH1_c.226delG_frameshift_variant	0.75893	MSH6_c.3261delC_frameshift_variant	0.27273
MMRD_188	COAD	60	31.08	MSI	MLH1-; PMS2-	pos	MSH6_c.3261delC_frameshift_variant	0.5407	MSH2_c.211+2T>G_splice_donor_variant&intron_variant	0.08911	MLH1_c.1564C>T_missense_variant	0.08421
MMRD_190	COAD	40	21.27	MSI	MLH1-; PMS2-	neg	MSH6_c.4001+1_4001+2insTAAC_splice_donor_variant&intron_variant	0.40784	MSH2_c.211+2T>G	0.06742
MMRD_192	COAD	50	8.39	MSS
MMRD_194	COAD	70	18.7	MSI	MLH1-; PMS2-	pos	wt
MMRD_196	COAD	60	8.71	MSS
MMRD_198	COAD	30	9.62	MSS	pMMR	neg	wt
MMRD_200	COAD	60	8.58	MSS
MMRD_202	COAD	40	14.64	MSI	MLH1-; PMS2-	neg	MSH6_c.3226C>T_missense_variant	0.36765	MSH6_c.3261dupC_frameshift_variant	0.32258
MMRD_204	COAD	90	21.05	MSI	MSH2-; MSH6-	neg	MSH2_c.1221_1222delCT_frameshift_variant	0.81184	MSH6_c.3284G>A_missense_variant	0.32854
MMRD_206	COAD	80	8.29	MSS	pMMR
MMRD_208	COAD	60	8.44	MSS
MMRD_210	COAD	40	8.63	MSS	pMMR
MMRD_212	COAD	60	21.21	MSI	MLH1-; PMS2-	pos	MSH2_c.211+2T>G_splice_donor_variant&intron_variant	0.08889
MMRD_214	COAD	30	19.74	MSI	MLH1-; PMS2-		PMS2_c.1687C>T_stop_gained	0.24187	MSH2_c.211+2T>G_splice_donor_variant&intron_variant	0.08547
MMRD_216	COAD	80	8.52	MSS
MMRD_218	COAD	50	21.76	MSI	MLH1-; PMS2-	neg	MLH1_c.2138delA_frameshift_variant	0.37736	MLH1_c.199G>A_missense_variant	0.48361	MSH2_c.211+2T>C_splice_donor_variant&intron_variant	0.21795
MMRD_220	COAD	90	20.17	MSI	MLH1-; PMS2-	neg	MLH1_c.1731G>A	0.92
MMRD_222	COAD	70	8.07	MSS	pMMR	neg
MMRD_224	COAD	30	25.4	MSI	MLH1-; PMS2-	pos	MLH1_c.709delA_frameshift_variant	0.2911	MSH6_c.3261dupC_frameshift_variant	0.32265
MMRD_226	COAD	50	15.78	MSI	MLH1-; PMS2-	pos	wt
MMRD_228	COAD	50	16.27	MSI	MSH2-; MSH6-	neg	MSH2_c.1231delA_frameshift_variant	0.5105	MSH2_c.1331_1341delGTTCTGACTTC_frameshift_variant	0.42829
MMRD_230	COAD	40	8.25	MSS
MMRD_232	COAD	50	8.69	MSS	pMMR
MMRD_234	COAD	50	7.28	MSS	pMMR	neg
MMRD_236	COAD	80	7.64	MSS	pMMR
MMRD_238	COAD	60	8.41	MSS
MMRD_240	COAD	50	9.88	MSS	pMMR	neg	MSH2_c.2635-2A>G_splice_acceptor_variant&intron_variant	0.49315
MMRD_242	COAD	40	8.74	MSS	pMMR	neg
MMRD_244	COAD	50	8.98	MSS	pMMR	neg
MMRD_246	COAD	80	8.78	MSS	pMMR	neg
MMRD_248	COAD	60	22.53	MSI	MLH1-; PMS2-		MSH6_c.3261dupC_frameshift_variant	0.13015
MMRD_250	COAD	50	7.71	MSS
MMRD_252	COAD	80	26.09	MSI	MLH1-; PMS2-	pos	wt
MMRD_254	COAD	40	8.78	MSS	pMMR	neg
MMRD_256	COAD	60	8.1	MSS	pMMR
MMRD_258	COAD	50	7.74	MSS	pMMR	neg
MMRD_260	COAD	80	7.56	MSS
MMRD_262	COAD	40	8.19	MSS
MMRD_264	COAD	60	8.1	MSS
MMRD_266	COAD	80	7.77	MSS	pMMR
MMRD_268	COAD	70	25.84	MSI	MLH1-; PMS2-	neg	MLH1_c.1499_1505delTCATTAA_frameshift_variant	0.75339	MSH6_c.3261delC_frameshift_variant	0.39917
MMRD_270	COAD	50	20.18	MSI	MLH1-; PMS2-	pos	MSH2_c.211+2T>G_splice_donor_variant&intron_variant	0.10759
MMRD_272	COAD	70	8.39	MSS	pMMR
MMRD_274	COAD	50	8.8	MSS	pMMR	neg
MMRD_276	COAD	70	8.4	MSS	pMMR
MMRD_280	COAD	40	8.49	MSS
MMRD_282	COAD	70	8.48	MSS
MMRD_284	COAD	80	8.33	MSS
MMRD_306	COAD	80	12.87	MSI	MLH1-; PMS2-	pos	MSH6_c.3261delC_frameshift_variant	0.32937	MSH2_c.211+2T>G_splice_donor_variant&intron_variant	0.11321
MMRD_332	COAD		9.1	MSS			ND
MMRD_333	COAD	70	22.09	MSI			MLH1_c.885-1G>A_splice_acceptor_variant&intron_variant	0.57812	PMS2_c.1351dupA_frameshift_variant	0.12929	MSH6_c.118delG_frameshift_variant	0.13636
MMRD_334	COAD	80	24.89	MSI			MLH1_c.1896+1G>T_splice_donor_variant&intron_variant	0.77489	MSH6_c.3261delC_frameshift_variant	0.42455	PMS2_c.1351dupA_frameshift_variant	0.14809
MMRD_335	COAD	40	24.62	MSI			MSH6_c.1082G>A_missense_variant	0.39007	MSH6_c.1082G>A_missense_variant	0.39007
MMRD_338	COAD	30	19.53	MSI			MSH2_c.1204C>T_stop_gained	0.25042	MSH2_c.2416dupA_frameshift_variant	0.25155	MSH6_c.2028_2029delAA_frameshift_variant	0.21956
MMRD_339	COAD	40	27.97	MSI			MSH6_c.3245C>T_missense_variant	0.40094	MSH6_c.3261delC_frameshift_variant	0.39615	PMS2_c.1351dupA_frameshift_variant	0.1903
MMRD_340	COAD		19.64	MSI			MLH1_c.1667+2T>G_splice_donor_variant&intron_variant	0.0814
MMRD_341	COAD		20.29	MSI			PMS2_c.1351dupA_frameshift_variant	0.1275
MMRD_342	COAD		8.85	MSS
MMRD_343	COAD		11.5	MSI			PMS2_c.1351dupA_frameshift_variant	0.24423
MMRD_344	COAD		8.45	MSS
MMRD_345	COAD		8.99	MSS
MMRD_346	COAD		8.57	MSS
MMRD_347	COAD	40	11.34	MSI			MLH1_c.492dupA_frameshift_variant	0.10962
MMRD_348	COAD		8.5	MSS
MMRD_349	COAD		8.5	MSS
MMRD_350	COAD		7.96	MSS
MMRD_351	COAD		7.9	MSS
MMRD_352	COAD		14.63	MSI			MSH6_c.3261delC_frameshift_variant	0.27684
MMRD_353	COAD		8.48	MSS
MMRD_354	COAD		9.14	MSS
MMRD_355	COAD		8.09	MSS
MMRD_356	COAD		22.31	MSI			wt
MMRD_357	COAD		8.35	MSS
MMRD_358	COAD		8.83	MSS
MMRD_582	COAD	70	19.27	MSI
MMRD_602	COAD		7.43	MSS
