# Supplementary material for: Detecting Microsatellite Instability in Endometrial, Colon, and Stomach Cancers Using Targeted NGS
Source: Cancers (Basel). 2023 Oct 20;15(20):5065. doi: 10.3390/cancers15205065 (PMC10605658; doi:10.3390/cancers15205065)
Supplement: Supplementary file 1 [file cancers-15-05065-s001.zip › Table_S2.xlsx]

## Sheet: Лист1
Gene	Chromosome	Amplicon Start	Amplicon End	Repeat Type
ABCC5	chr3	183665234	183665308	(A)9
ABLIM1	chr10	116197469	116197543	(T)9
ACVR2A	chr2	148683656	148683730	(A)8
AHCYL2	chr7	129045627	129045702	(T)9
AKAP7	chr6	131481246	131481320	(A)8
ARHGEF15	chr17	8216751	8216825	(T)9
ASAP1	chr8	131193118	131193196	(A)12
ATP2A1	chr16	28913605	28913680	(C)8
ATP6V0A2	chr12	124232252	124232336	(T)9
BAT25	chr4	55598182	55598268	(T)25
BAT26	chr2	47641531	47641620	(A)27
BAX	chr19	49458941	49459015	(G)8
BMPR2	chr2	203420098	203420172	(A)7
BPIFB4	chr20	31671178	31671252	(C)8
C6orf89	chr6	36867345	36867422	(C)8
CANX	chr5	179135134	179135216	(T)8
CCDC73	chr11	32635915	32635989	(T)9
CDO1	chr5	115148916	115148999	(A)9
CHD3	chr17	7798731	7798806	(C)7
CIR1	chr2	175246511	175246586	(A)11
COPB1	chr11	14480020	14480095	(A)9
DNAJC2	chr7	102960096	102960174	(A)9
DOCK10	chr2	225706595	225706684	(A)9
EFCAB5	chr17	28361197	28361275	(T)8
ELAVL3	chr19	11577568	11577644	(C)9
ERBB3	chr12	56487823	56487898	(C)8
ESRP1	chr8	95686583	95686658	(A)8
EXOC6B	chr2	72968568	72968645	(A)9
FAM161A	chr2	62063059	62063145	(A)17
FBXW10	chr17	18653277	18653362	(T)9
FNDC3B	chr3	172028573	172028647	(T)8
GCHFR	chr15	41059365	41059439	(C)8
GLYR1	chr16	4862193	4862267	(C)8
GPAT2	chr2	96690435	96690512	(C)8
GPR107	chr9	132848781	132848864	(T)9
GSE1	chr16	85682249	85682324	(C)8
HNRNPC	chr14	21702366	21702441	(A)8
IGDCC4	chr15	65687600	65687675	(C)7
IMPDH1	chr7	128035099	128035174	(C)7
IRS2	chr13	110407528	110407602	(T)12
JAK1	chr1	65306963	65307038	(T)8
JPH4	chr14	24040402	24040476	(C)9
KIAA1033	chr12	105538632	105538713	(T)8
KIF14	chr1	200594009	200594097	(T)8
KNOP1	chr16	19725669	19725753	(T)10
LHCGR-GTF2A1L	chr2	48952875	48952954	(A)9
LMAN1	chr18	57013170	57013244	(T)9
LRRK1	chr15	101550826	101550906	(T)15
MEIS1	chr2	66796066	66796140	(T)10
MICU3	chr8	16961844	16961925	(T)9
Mono27	chr2	39573037	39573144	(A)27
MORC1	chr3	108690128	108690202	(A)8
MRE11A	chr11	94212899	94212974	(A)11
MSH3	chr5	79970881	79970955	(A)8
MYH11	chr16	15802648	15802722	(G)8
MYO1A	chr12	57422529	57422613	(T)8
NMS	chr2	101098692	101098766	(T)9
NR21	chr14	23652259	23652352	(A)21
NR24	chr2	95849334	95849411	(T)23
PLCB4	chr20	9416158	9416232	(T)9
PMS1	chr2	190687138	190687212	(T)9
PREPL	chr2	44550526	44550600	(A)8
PTHLH	chr12	28114864	28114941	(T)11
PTPN4	chr2	120714368	120714449	(T)16
RBM27	chr5	145647281	145647356	(T)11
RECQL	chr12	21644513	21644588	(A)18
SCLT1	chr4	129864123	129864204	(A)9
SLC23A2	chr20	4850524	4850599	(G)9
SLC3A2	chr11	62649498	62649574	(A)8
SLC4A3	chr2	220494077	220494151	(C)7
SNX16	chr8	82715433	82715507	(A)8
TAF2	chr8	120800659	120800737	(A)10
TARSL2	chr15	102287950	102288039	(T)10
TDRD1	chr10	115963092	115963166	(T)9
TEAD2	chr19	49850443	49850517	(G)8
TGFBR2	chr3	30691843	30691917	(A)10
THOC1	chr18	252589	252663	(A)9
TMEM60	chr7	77423424	77423499	(T)9
XYLT2	chr17	48433933	48434007	(C)7
ZNF43	chr19	22001996	22002070	(A)8
