# Supplementary material for: Detecting Microsatellite Instability in Endometrial, Colon, and Stomach Cancers Using Targeted NGS
Source: Cancers (Basel). 2023 Oct 20;15(20):5065. doi: 10.3390/cancers15205065 (PMC10605658; doi:10.3390/cancers15205065)
Supplement: Supplementary file 1 [file cancers-15-05065-s001.zip › Table_S3.xlsx]

## Sheet: Лист1
Gene	All	STAD	UCEC	COAD
ABCC5	0.867651	0.761986	0.874196	0.892113
ABLIM1	0.565398	0.653253	0.505792	0.566964
ACVR2A	0.823517	0.969178	0.747319	0.957217
AHCYL2	0.718415	0.892979	0.660232	0.829613
AKAP7	0.664413	0.774829	0.566173	0.798363
ARHGEF15	0.537555	0.618151	0.48402	0.594122
ASAP1	0.896193	0.945205	0.849743	0.969494
ATP2A1	0.571691	0.615582	0.524346	0.574033
ATP6V0A2	0.754261	0.794521	0.654869	0.885045
BAX	0.774929	0.997432	0.727799	0.842262
BMPR2	0.580523	0.696062	0.439511	0.791295
BPIFB4	0.587646	0.694349	0.520807	0.683036
C6orf89	0.567055	0.565925	0.527563	0.567708
CANX	0.74043	0.714897	0.739382	0.771205
CCDC73	0.628412	0.928082	0.576362	0.686384
CDO1	0.799715	0.877568	0.75236	0.847098
CHD3	0.661875	0.414384	0.708709	0.65253
CIR1	0.906216	0.931507	0.870442	0.975446
COPB1	0.7777	0.862158	0.741849	0.801339
DNAJC2	0.542916	0.740582	0.46332	0.550595
DOCK10	0.778322	0.878425	0.682218	0.882812
EFCAB5	0.571924	0.560788	0.544402	0.617932
ELAVL3	0.585755	0.580479	0.521557	0.651414
ERBB3	0.716731	0.827911	0.668383	0.767485
ESRP1	0.702694	0.880993	0.635135	0.806548
EXOC6B	0.799119	0.902397	0.755684	0.864583
FAM161A	0.645092	0.873288	0.520592	0.938244
FBXW10	0.492774	0.455479	0.561454	0.514881
FNDC3B	0.600389	0.689212	0.570034	0.630208
GCHFR	0.681222	0.610445	0.670635	0.727307
GLYR1	0.598291	0.635274	0.571965	0.62314
GPAT2	0.619839	0.764555	0.591806	0.674107
GPR107	0.793888	0.894692	0.706135	0.937128
GSE1	0.661953	0.671233	0.675568	0.579241
HNRNPC	0.611836	0.774829	0.590197	0.578125
IGDCC4	0.720228	0.690068	0.679751	0.75744
IMPDH1	0.788423	0.737158	0.794187	0.773065
IRS2	0.878762	0.876712	0.83891	0.967262
JAK1	0.713468	0.547945	0.749356	0.700149
JPH4	0.731132	0.600171	0.75311	0.728423
KIAA1033	0.685833	0.813356	0.634706	0.71875
KIF14	0.794198	0.771404	0.720292	0.917783
KNOP1	0.64548	0.800514	0.58891	0.716146
LHCGR-GTF2A1L	0.791064	0.817637	0.725332	0.91369
LMAN1	0.804455	0.885274	0.750215	0.887649
LRRK1	0.642554	0.768836	0.552982	0.972098
MEIS1	0.935302	0.933219	0.916452	0.987723
MICU3	0.697384	0.712329	0.634599	0.86756
MORC1	0.713131	0.767123	0.666667	0.798363
MRE11A	0.925019	0.947774	0.880202	0.979167
MSH3	0.778244	0.741438	0.732411	0.829613
MYH11	0.676198	0.714041	0.580867	0.833333
MYO1A	0.680963	0.587329	0.663556	0.719494
NMS	0.705491	0.964041	0.586873	0.895089
PLCB4	0.648304	0.832192	0.534106	0.87128
PMS1	0.819865	0.835616	0.759974	0.956473
PREPL	0.720772	0.691781	0.64822	0.870164
PTHLH	0.864258	0.824486	0.830223	0.963542
PTPN4	0.838721	0.869007	0.825719	0.973958
RBM27	0.774955	0.86387	0.721579	0.854167
RECQL	0.591427	0.756849	0.53003	0.605283
SCLT1	0.580109	0.696918	0.514479	0.624256
SLC23A2	0.668713	0.85274	0.626126	0.643973
SLC3A2	0.6662	0.809075	0.618833	0.787574
SLC4A3	0.581093	0.777397	0.521879	0.657366
SNX16	0.698265	0.684075	0.623552	0.823661
TAF2	0.759052	0.975171	0.700343	0.802827
TARSL2	0.813831	0.715753	0.804161	0.90997
TDRD1	0.708392	0.844178	0.654762	0.715402
TEAD2	0.776379	0.754281	0.764479	0.81622
TGFBR2	0.807537	0.986301	0.771986	0.868304
THOC1	0.556099	0.578767	0.467932	0.651042
TIAL1	0.804248	0.898116	0.763299	0.88058
TIAL1.1	0.653639	0.845034	0.576898	0.787574
TM2D1	0.696762	0.611301	0.692085	0.739583
TMEM60	0.742761	0.857021	0.675568	0.826637
UBR5	0.933748	0.963185	0.89275	0.984375
UBR5.1	0.718933	0.916952	0.650472	0.839286
UBR5.2	0.69166	0.921233	0.65562	0.633929
XYLT2	0.719347	0.710616	0.688117	0.768973
ZNF43	0.621627	0.569349	0.621085	0.743304
