# Supplementary material for: Detecting Microsatellite Instability in Endometrial, Colon, and Stomach Cancers Using Targeted NGS
Source: Cancers (Basel). 2023 Oct 20;15(20):5065. doi: 10.3390/cancers15205065 (PMC10605658; doi:10.3390/cancers15205065)
Supplement: Supplementary file 1 [file cancers-15-05065-s001.zip › Table_S4.xlsx]

## Sheet: Лист1
Gene	STAD	STAD	STAD	COAD	COAD	COAD	UCEC	UCEC	UCEC
	MSS_average_of_var_allelles_%	MSI_average_of_var_allelles_%	pval	MSS_average_of_var_allelles_%	MSI_average_of_var_allelles_%	pval	MSS_average_of_var_allelles_%	MSI_average_of_var_allelles_%	pval
ABCC5	0.11505	0.172071	0.00635443	0.133619	0.29617	8.80378e-08	0.120337	0.213699	8.44823e-10
ABLIM1	0.0602821	0.0985176	0.0058813	0.0746667	0.0829787	0.108153	0.0666292	0.0790411	0.0600188
ACVR2A	0.0321803	0.327482	1.06234e-05	0.0415238	0.45	8.18549e-19	0.0332584	0.111781	1.50941e-07
AHCYL2	0.0820775	0.218576	0.000670081	0.0939048	0.262553	5.67262e-07	0.0832584	0.118493	0.000114047
AKAP7	0.0306104	0.109682	0.00488965	0.0386667	0.19617	5.41577e-07	0.0347191	0.0543836	0.00587926
ARHGEF15	0.0575202	0.0651294	0.065274	0.0661905	0.0719149	0.0853791	0.0630337	0.0635616	0.438033
ASAP1	0.14306	0.407776	1.57726e-06	0.163048	0.526809	7.31466e-18	0.167865	0.380822	3.74002e-15
ATP2A1	0.0125064	0.0312235	0.0922764	0.0131429	0.0512766	0.00748548	0.0144944	0.0236986	0.0196749
ATP6V0A2	0.0593422	0.306412	0.000526539	0.0760952	0.265957	1.60048e-08	0.0737079	0.132192	0.000240591
BAX	0.0149942	0.163282	5.50032e-05	0.0158095	0.143617	6.08529e-07	0.0146067	0.0927397	3.5397e-05
BMPR2	0.0133283	0.0274824	0.00986684	0.019619	0.210851	3.47425e-07	0.0175281	0.0213699	0.187233
BPIFB4	0.0178936	0.100412	0.00270298	0.0175238	0.0687234	0.00112531	0.0189888	0.0430137	0.0104584
C6orf89	0.0339064	0.0498706	0.145219	0.0308571	0.0842553	0.00370286	0.0365169	0.049726	0.0158196
CANX	0.0254532	0.0651647	0.0136511	0.0253333	0.129149	4.10715e-05	0.0286517	0.0741096	4.43552e-05
CCDC73	0.0434867	0.149659	0.00414829	0.052381	0.117234	0.000302768	0.0457303	0.0586301	0.0138365
CDO1	0.051437	0.201529	0.000557374	0.0690476	0.27234	2.42065e-09	0.06	0.127534	3.31349e-06
CHD3	0.0118439	0.0196118	0.0930792	0.0130476	0.0523404	0.0110395	0.0139326	0.099726	5.2777e-06
CIR1	0.30662	0.489235	1.31629e-05	0.349048	0.618298	1.17641e-19	0.320337	0.481918	4.40006e-17
COPB1	0.108251	0.245588	0.000291351	0.117714	0.302766	5.02496e-09	0.11191	0.189178	2.62945e-07
DNAJC2	0.0698948	0.0832	0.0215152	0.0815238	0.0912766	0.053432	0.0783146	0.0750685	0.230003
DOCK10	0.122036	0.256424	0.0004151	0.138476	0.318936	1.41767e-09	0.149663	0.220959	3.23277e-06
EFCAB5	0.0382428	0.0670824	0.050463	0.046	0.082766	0.00340103	0.0417978	0.0647945	0.0121831
ELAVL3	0.0267665	0.0655176	0.0587001	0.0224762	0.0821277	1.85424e-05	0.028427	0.0332877	0.088196
ERBB3	0.0194035	0.149247	0.000559228	0.0200952	0.148936	1.54485e-06	0.0188764	0.0656164	5.73973e-05
ESRP1	0.0300046	0.102	0.00363095	0.0355238	0.175957	2.79103e-06	0.0320225	0.11137	0.00034574
EXOC6B	0.0627399	0.2128	0.000961541	0.0754286	0.244043	5.99032e-07	0.0676404	0.149726	4.92614e-07
FAM161A	0.641986	0.854929	1.93175e-07	0.762286	0.896809	2.9729e-27	0.607753	0.602329	0.452965
FBXW10	0.0835306	0.0820235	0.41783	0.0767619	0.097234	0.0370806	0.0740449	0.0850685	0.0610699
FNDC3B	0.0270104	0.0372706	0.0939706	0.0299048	0.0587234	0.0046423	0.028427	0.0543836	0.00212703
GCHFR	0.0163249	0.0668941	0.0234643	0.0173333	0.112979	0.000125997	0.0169663	0.049863	0.000493709
GLYR1	0.0130671	0.0611882	0.0326343	0.0131429	0.152128	9.2146e-05	0.0191011	0.0705479	0.00160095
GPAT2	0.0268497	0.0780588	0.0235304	0.0502857	0.0782979	0.035724	0.0239326	0.0447945	0.0113303
GPR107	0.0694601	0.226847	0.00146231	0.0893333	0.294894	3.42858e-10	0.0846067	0.163288	2.62193e-07
GSE1	0.0180266	0.0313765	0.070382	0.0255238	0.0682979	0.0137717	0.0176404	0.0606849	0.000326636
HNRNPC	0.0554405	0.0761059	0.114675	0.0613333	0.07	0.143716	0.061573	0.0682192	0.0255989
IGDCC4	0.00626936	0.0496471	0.0836405	0.00857143	0.131915	3.41659e-05	0.0101124	0.0567123	0.000272719
IMPDH1	0.033148	0.0780471	0.097963	0.0552381	0.178936	5.98268e-05	0.0285393	0.155616	1.02871e-06
IRS2	0.105077	0.314365	1.72819e-05	0.116667	0.502766	2.05758e-17	0.0991011	0.266027	2.61427e-11
JAK1	0.0173249	0.0684353	0.0366858	0.0185714	0.0348936	0.0364951	0.0182022	0.157808	5.3498e-09
JPH4	0.0483942	0.132282	0.00281634	0.0433333	0.208298	1.30294e-07	0.044382	0.133836	4.03179e-06
KIAA1033	0.0216486	0.123329	0.00227153	0.0309524	0.124468	0.000239188	0.025618	0.0532877	0.00755137
KIF14	0.0150474	0.131388	0.00299703	0.0249524	0.177872	5.95857e-08	0.0221348	0.0967123	1.13835e-06
KNOP1	0.150607	0.202706	0.00436649	0.177714	0.241915	4.67356e-05	0.155169	0.18863	0.00224653
LHCGR-GTF2A1L	0.103558	0.225376	0.00190539	0.116476	0.340851	3.66129e-11	0.11191	0.184521	1.01363e-05
LMAN1	0.097659	0.221071	0.00408148	0.110095	0.274468	2.90126e-10	0.10427	0.196712	1.08495e-07
LRRK1	0.758518	0.858965	0.00871851	0.788095	0.886809	5.29724e-25	0.685169	0.697808	0.276488
MEIS1	0.169413	0.422906	3.60113e-05	0.186762	0.529574	8.19965e-17	0.178202	0.365342	4.30597e-16
MICU3	0.0475827	0.152447	0.00192065	0.0570476	0.174255	2.66429e-06	0.0513483	0.09	0.000573875
MORC1	0.0335549	0.176882	0.00103197	0.0360952	0.137021	4.90236e-06	0.0358427	0.09	1.42335e-05
MRE11A	0.244195	0.447376	5.39203e-06	0.273524	0.538511	9.27049e-16	0.264607	0.440548	1.0198e-14
MSH3	0.059311	0.2078	0.000109526	0.0630476	0.268085	2.22131e-08	0.0678652	0.14274	1.50896e-06
MYH11	0.0208197	0.0933529	0.0114533	0.0205714	0.143404	2.14649e-05	0.0205618	0.0636986	0.0010433
MYO1A	0.0655191	0.206282	0.00846377	0.0700952	0.165745	4.64581e-05	0.074382	0.127123	0.000199304
NMS	0.0923017	0.275388	4.58471e-05	0.106571	0.374255	6.56959e-12	0.104607	0.142466	0.00320334
PLCB4	0.0936867	0.178929	0.00324259	0.0977143	0.241915	6.86988e-07	0.0894382	0.135616	0.00255944
PMS1	0.0588139	0.196976	0.000179619	0.0637143	0.361915	2.47423e-12	0.0620225	0.117123	9.79899e-08
PREPL	0.0394243	0.0984824	0.0135987	0.0412381	0.197872	1.30587e-05	0.0478652	0.116438	2.03388e-05
PTHLH	0.299684	0.482729	4.56742e-06	0.303524	0.565745	7.41022e-18	0.299101	0.441781	8.00041e-12
PTPN4	0.399628	0.648906	1.0001e-06	0.501714	0.76617	4.13766e-26	0.378539	0.560822	2.65109e-14
RBM27	0.0629642	0.155541	0.000385909	0.0715238	0.202553	7.40223e-08	0.0646067	0.139863	6.62433e-07
RECQL	0.0743017	0.110071	0.00581604	0.0855238	0.109149	0.00436393	0.0842697	0.0945205	0.0678268
SCLT1	0.0600301	0.0647294	0.279268	0.0770476	0.121277	0.00774728	0.0697753	0.0738356	0.242873
SLC23A2	0.0573572	0.152788	0.000186537	0.0631429	0.162128	4.53621e-07	0.0630337	0.0926027	0.000530459
SLC3A2	0.0356913	0.111788	0.00381678	0.0471429	0.143404	2.08281e-05	0.0429213	0.0620548	0.00251846
SLC4A3	0.0556636	0.128118	0.00448536	0.0619048	0.128723	0.000807295	0.0564045	0.0724658	0.0108001
SNX16	0.0339353	0.109835	0.00997723	0.0459048	0.170851	4.76506e-06	0.0414607	0.0719178	0.00172209
TAF2	0.139798	0.355988	0.000243419	0.152571	0.346596	8.13875e-10	0.146517	0.244384	1.58023e-06
TARSL2	0.15349	0.263024	0.00106124	0.163524	0.382128	1.50814e-10	0.158989	0.256849	1.08595e-08
TDRD1	0.244591	0.538847	0.000327602	0.266286	0.475319	2.91023e-05	0.27191	0.398767	0.00222985
TEAD2	0.0219734	0.0870824	0.00343674	0.0274286	0.168298	1.21526e-06	0.0204494	0.0732877	1.69861e-05
TGFBR2	0.233908	0.473071	5.232e-06	0.243619	0.563404	1.11606e-15	0.235506	0.308219	2.44492e-07
THOC1	0.0720983	0.0855294	0.222408	0.0842857	0.107447	0.00880544	0.0858427	0.0915068	0.207195
TIAL1	0.0417121	0.183565	0.00210612	0.0489524	0.21234	3.8509e-07	0.0438202	0.0820548	5.39994e-06
TIAL1.1	0.0745306	0.112024	0.0107128	0.0895238	0.171064	5.26756e-05	0.0791011	0.100411	0.00551695
TM2D1	0.0342879	0.106106	0.00384811	0.0320952	0.125319	4.67335e-05	0.0378652	0.0963014	0.00062432
TMEM60	0.0557179	0.137659	0.0146844	0.0675238	0.215106	3.97837e-06	0.0635955	0.11137	3.57923e-05
UBR5	0.358829	0.657929	2.17208e-09	0.358762	0.701489	7.45126e-23	0.451348	0.663014	3.31569e-19
UBR5.1	0.0556613	0.164259	0.000425903	0.0689524	0.178511	3.91264e-06	0.0620225	0.0982192	0.00194519
UBR5.2	0.132103	0.321506	0.00820941	0.144762	0.209362	0.0410216	0.102809	0.209726	0.000749347
XYLT2	0.00905202	0.101882	0.00396751	0.0126667	0.0708511	0.000410051	0.01	0.0617808	0.000101521
ZNF43	0.0409468	0.0714118	0.0491199	0.0448571	0.184894	7.33222e-06	0.0333708	0.0664384	0.000151285
